# Supplementary material for: Risk factors for high CAD-RADS scoring in CAD patients revealed by machine learning methods: a retrospective study
Source: PeerJ. 2023 Aug 3;11:e15797. doi: 10.7717/peerj.15797 (PMC10404399; doi:10.7717/peerj.15797)
Supplement: Supplemental Information 1 [file peerj-11-15797-s001.xlsx]

## Sheet: data20221010
group	age	gender	systolic blood pressure	diastolic blood pressure	mean arterial pressure	pulse pressure index	pulse pressure	hypertension	siabetes	smoking	dyslipidemia	total cholesterol	triglycerides	LDL-C	HDL-C	uric acid	plasma fibrinogen	creatinine	urea
1	42	1	108	72	84	0.33	36	0	0	0	0	3.95	1.34	2.37	0.97	379	1.34	92	4
1	74	1	120	70	86.67	0.42	50	0	0	0	1	5.49	1.56	2.96	1.82	279	1.38	69	8
1	51	2	110	80	90	0.27	30	0	0	0	0	3.76	0.71	2	1.44	236.1	2	67	5.3
1	45	1	120	90	100	0.25	30	0	0	1	0	4.8	0.8	3.38	1.2	235	2.38	82.5	5.1
1	59	2	222	116	151.33	0.48	106	1	0	0	1	5.4	1.09	3.59	1.31	359	1.9	55	4.1
1	75	1	100	60	73.33	0.4	40	0	0	0	0	2.6	0.71	1.68	0.6	252.3	4.16	62.4	3.73
1	61	1	120	80	93.33	0.33	40	0	0	0	0	4.34	0.8	2.21	1.1	325	3.54	75	5.31
1	65	2	90	60	70	0.33	30	0	0	0	0	5.8	1	3.15	2.1	239	2.67	79.4	5.3
1	67	1	100	70	80	0.3	30	0	1	0	1	3.79	1.8	2.21	0.76	259.3	2.1	78	4.3
1	40	1	129	60	83	0.53	69	0	0	1	0	2.99	1.64	2.21	0.51	186	2.58	87.7	4.8
1	65	2	106	64	78	0.4	42	0	0	0	0	3.83	0.99	1.9	1.48	190.2	1.8	56.2	5.68
1	53	2	130	90	103.33	0.31	40	0	0	0	1	6.22	2.43	3.27	1.85	252.6	2.12	54	3.7
1	51	2	110	50	70	0.55	60	0	0	0	0	4.53	0.72	3.06	1.98	246	4.58	50	4.02
1	49	2	100	60	73.33	0.4	40	0	0	0	0	3.45	1.64	1.63	1.07	253.2	2.61	62	4.8
1	51	2	170	100	123.33	0.41	70	1	0	0	0	4.2	0.9	2.69	1.3	257	3.29	80.5	3.62
1	53	1	150	100	116.67	0.33	50	1	0	1	1	6	1.37	4.42	2.52	302	2.05	66.8	7.69
1	56	1	136	80	98.67	0.41	56	0	0	1	0	5.2	1.4	3.23	1.3	248	4.65	108.8	4.22
1	64	2	142	92	108.67	0.35	50	1	0	0	1	5.71	1.96	3.45	1.37	356.6	2.3	65	5.9
1	73	1	160	90	113.33	0.44	70	0	0	0	0	4.15	0.76	2.26	1.54	246	1.96	89	5.4
1	69	1	170	110	130	0.35	60	1	0	1	1	3.92	1.92	2.34	0.71	414.1	2	113	7.5
1	71	2	120	70	86.67	0.42	50	0	0	0	1	4.6	2.3	2.25	1.2	251	3.68	86.1	5.61
1	57	2	120	80	93.33	0.33	40	0	0	0	0	5.07	1.13	2.5	1.9	215	3.17	102.1	7.21
1	52	1	124	77	92.67	0.38	47	0	0	0	0	3.89	0.43	1.98	1.71	268.6	3.4	90	8
1	51	2	110	70	83.33	0.36	40	0	0	0	1	5.06	2.57	2.58	1.31	199	2	67	4.1
1	75	2	130	70	90	0.46	60	1	0	0	1	6.4	1.6	3.9	1.8	256	2.66	84.4	4.3
1	55	1	110	70	83.33	0.36	40	0	0	1	0	4.04	0.88	2.4	1.24	496	1.87	97	4.4
1	53	2	138	90	106	0.35	48	0	0	0	0	5.63	1.74	3.46	1.2	272	2.56	44.7	4.77
1	56	2	121	84	96.33	0.31	37	0	0	0	0	3.95	0.7	2.41	1.38	254	2.74	61	4.33
1	66	2	116	70	85.33	0.4	46	0	0	0	0	4.4	1	2.25	1.6	216	3.03	62.8	4
1	79	2	121	71	87.67	0.41	50	0	0	0	0	4.06	1.51	2.08	1.31	319	3.05	89	8.15
1	48	2	110	80	90	0.27	30	0	0	0	0	4.72	1.33	3.91	1.44	272	2.6	85.1	3.49
1	29	1	140	80	100	0.43	60	0	0	0	1	6.31	2.7	2.98	1	421	3.01	77	3.93
1	51	1	180	90	120	0.5	90	1	0	0	1	4.71	1.29	3.07	1.05	371.4	2	113	5.3
1	56	2	120	70	86.67	0.42	50	0	0	0	0	4.56	1.25	2.24	1.75	146.4	2.33	4360	4.53
1	64	2	110	60	76.67	0.45	50	0	0	0	0	3.35	0.69	1.61	1.43	378	1.76	99	6.8
1	68	2	134	64	87.33	0.52	70	0	0	0	0	4.99	1.5	2.79	1.21	386	2.91	89.9	7.7
1	59	1	120	70	86.67	0.42	50	0	1	0	0	4.13	2.25	1.69	1.42	442	1.74	73	4.9
1	50	1	110	70	83.33	0.36	40	0	0	0	0	4.3	5.4	2.25	1	359	2.55	100.9	3.94
1	64	2	130	70	90	0.46	60	1	0	0	0	4.53	4.17	1.55	1.08	235.1	2.31	53	4.9
1	55	1	150	70	96.67	0.53	80	1	1	1	0	4.29	1.41	2.98	0.81	440	2.64	93.7	4.56
1	59	2	180	90	120	0.5	90	1	0	0	1	3.1	3.3	1.58	0.7	309	3.96	90.6	6.27
1	49	2	149	91	110.33	0.39	58	1	0	0	1	4.28	2.32	1.88	1.35	332	2.01	69	4.1
1	41	1	140	70	93.33	0.5	70	0	0	0	0	4.7	1.37	2.87	1.21	285	1.84	86	3.2
1	68	1	124	70	88	0.44	54	0	0	0	0	3.5	0.9	2.17	1.1	273	3.01	75	6.02
1	42	1	157	130	139	0.17	27	1	0	1	0	3.29	0.61	2.3	0.71	346	1.58	93	3.2
1	59	1	128	74	92	0.42	54	0	0	1	1	5.88	2.88	3.92	1.76	324	2.47	63.6	4.58
1	64	2	110	70	83.33	0.36	40	0	0	0	0	5.77	1.23	4.22	2.04	266	3.88	56.2	4.61
1	51	1	180	100	126.67	0.44	80	0	1	1	1	7.1	2.8	4.95	1.5	327	3.33	105.1	6.3
1	44	2	120	80	93.33	0.33	40	0	0	0	1	6	5.9	3.9	1.4	294	1.9	99.8	6.2
1	64	1	150	90	110	0.4	60	1	0	0	0	4.72	1.22	3.65	1.17	311	6.54	80.7	5.32
1	58	1	100	70	80	0.3	30	0	0	1	0	5	0.6	2.7	1.6	259	3.06	83.3	6.43
1	80	2	110	70	83.33	0.36	40	0	1	0	1	5.02	1.86	2.99	1.18	226.4	2.17	51	4.7
1	60	1	100	70	80	0.3	30	0	0	0	0	5.49	0.89	4.08	1.16	320	3.37	64.2	5.72
1	67	2	120	78	92	0.35	42	0	1	0	1	6.33	10.88	0.52	1.86	278.2	1.46	42	4
1	52	2	111	76	87.67	0.32	35	0	0	0	0	5.7	1.5	3.68	1.7	263	3.24	69.8	5.48
1	64	2	160	80	106.67	0.5	80	1	0	0	1	6.31	2.11	4.13	1.44	355	3.61	66.8	4.4
1	72	1	166	88	114	0.47	78	1	0	1	0	2.5	0.96	1.5	0.56	157	3.82	9800	5.3
1	75	2	130	80	96.67	0.38	50	0	1	0	0	4.24	1.39	2.52	1.07	471	2.02	79	5.5
1	62	1	110	80	90	0.27	30	0	0	0	0	3.6	0.96	2.13	1.03	236.2	2.02	70	4.3
1	50	2	124	80	94.67	0.35	44	0	0	0	1	5.58	4.51	3.1	1.4	277	3.33	68	5.15
1	33	2	195	117	143	0.4	78	1	0	0	0	3.24	2.31	0.97	1.22	455.6	3.86	108	10.6
1	15	1	140	90	106.67	0.36	50	0	0	0	0	3.1	0.6	1.35	1.17	410	3.83	74.6	2.22
1	48	1	170	100	123.33	0.41	70	1	1	0	1	5.16	2.97	2.73	1.08	247.9	2.24	83	2.9
1	72	1	110	60	76.67	0.45	50	0	0	1	0	5.1	0.9	2.93	2	259	4.12	94	11
1	45	1	110	70	83.33	0.36	40	0	0	0	1	6.24	1.36	3.36	2.26	211.8	1.88	95	4.7
1	52	1	125	85	98.33	0.32	40	0	0	0	1	5.9	4.2	3.38	1	284	2.75	80.4	4.8
1	58	1	130	90	103.33	0.31	40	0	0	0	1	6.7	0.6	3.45	2.4	317	3.24	74.9	6.45
1	61	2	148	100	116	0.32	48	1	0	0	0	4.8	1.4	2.7	1.7	130	3.25	59.5	5.01
1	52	2	160	100	120	0.38	60	1	0	0	0	4.75	1.31	2.98	1.17	236.2	2.66	61	3.6
1	55	1	110	76	87.33	0.31	34	0	0	0	0	3.8	1.8	1.35	1.9	294	2.41	81.8	5
1	59	2	110	65	80	0.41	45	0	0	0	0	5.04	0.6	2.59	2.2	246	3.25	36.7	4.46
1	64	2	106	61	76	0.42	45	0	0	0	0	5.09	1.71	3.21	1.42	313	2.05	72	6.13
1	61	2	123	69	87	0.44	54	1	0	0	1	5.36	1.82	3.48	1.05	290.1	2.2	52	5.9
1	59	2	110	70	83.33	0.36	40	1	0	0	1	4.19	3.42	1.68	0.96	302.2	2.32	79	4.1
1	49	1	120	70	86.67	0.42	50	0	0	0	1	5.87	3.52	3.5	0.77	352	1.62	88	4.7
1	68	1	115	75	88.33	0.35	40	0	1	0	1	4.7	4	2.93	1.2	340	2.36	81.3	3.38
1	63	1	100	60	73.33	0.4	40	0	0	0	0	5.29	0.88	3.73	1.62	245	3.86	54	5.44
1	64	1	120	80	93.33	0.33	40	1	0	1	1	4.69	1.91	2.99	0.83	325	2.04	84	5.2
1	79	1	138	86	103.33	0.38	52	0	0	0	0	4.02	1.34	2.55	1.44	557	3.57	116	6.16
1	68	1	130	68	88.67	0.48	62	0	0	0	0	5.04	1.17	4	1.8	337	3.72	81	4.9
1	67	1	100	60	73.33	0.4	40	0	0	1	0	3.17	0.71	1.34	1.51	328.3	2.05	88	6.9
1	64	2	120	70	86.67	0.42	50	0	0	0	0	4.89	0.85	2.86	1.64	190	2.15	39	4.7
1	54	1	164	100	121.33	0.39	64	1	0	1	1	4.7	5.5	2.78	0.7	394	2.15	78.6	3.84
1	57	2	130	80	96.67	0.38	50	0	0	0	0	5.1	0.6	2.78	2.2	335	2.97	75.7	6.17
1	59	1	120	78	92	0.35	42	0	0	0	1	5	1.9	3.6	0.9	335	2.54	96.1	5.2
1	55	2	104	70	81.33	0.33	34	0	0	0	1	6.78	1.98	4.8	1.62	229	3.85	51.3	4.32
1	68	2	120	80	93.33	0.33	40	0	0	0	0	4.6	0.7	2.03	1.8	333	3.8	89.8	5.62
1	60	2	121	84	96.33	0.31	37	0	0	0	1	9.53	4.37	5.89	1.65	295	2.58	68	5
1	70	1	160	100	120	0.38	60	1	0	0	0	5.3	1.7	3.38	1.2	393	3.42	99.6	5.26
1	73	1	135	80	98.33	0.41	55	0	0	1	0	3.76	1.15	2.29	0.95	414	2.06	108.4	8.2
1	62	1	135	82	99.67	0.39	53	1	0	0	0	3.89	0.78	2.18	1.31	577	2.13	83.3	3.41
1	80	2	160	70	100	0.56	90	1	0	0	0	4.62	1.59	2.42	1.48	317	1.6	71	5
1	54	1	180	70	106.67	0.61	110	1	0	0	0	3.83	1.57	1.83	1.29	252	2.02	79	5.4
1	76	2	166	86	112.67	0.48	80	1	0	0	1	5.33	1.98	2.89	2.16	298	3.79	54.6	5.62
1	51	2	160	90	113.33	0.44	70	0	0	0	0	3.9	0.9	1.96	1.62	360	2.21	53.4	3.11
1	77	2	114	73	86.67	0.36	41	0	0	0	0	5.05	0.96	3.02	1.74	293	2.23	56.3	5.05
1	75	2	90	60	70	0.33	30	0	0	0	0	4.54	0.89	2.64	1.5	184.8	2.24	54	4.5
1	66	1	120	80	93.33	0.33	40	0	0	0	0	3.22	1.59	0.91	1.59	401.8	2	81	5.4
1	58	1	102	60	74	0.41	42	0	0	0	0	2.81	0.63	1.92	0.86	447	2.68	91.1	3.74
1	45	2	169	90	116.33	0.47	79	1	0	0	0	4.49	1.55	2.68	1.61	308	2.38	66.5	3.56
1	70	1	150	86	107.33	0.43	64	1	0	0	0	3.56	0.67	2.07	1.19	490	2	103	6.8
1	61	2	147	83	104.33	0.44	64	1	0	0	1	6.5	1.6	2.93	2.4	227	3.01	85.1	5.1
1	63	2	150	90	110	0.4	60	1	0	0	1	5.73	3.9	2.9	1.06	232	2.2	55	5.5
1	55	1	150	100	116.67	0.33	50	1	0	0	1	4.6	2.8	2.63	1.2	439	2.59	108.6	3.9
1	83	2	170	80	110	0.53	90	1	0	0	0	5.73	1.11	2.59	2	347	3.47	75.1	8.1
1	54	1	106	60	75.33	0.43	46	0	0	0	0	3.7	0.7	1.58	1.4	365	2.58	89.1	7.43
1	62	1	120	80	93.33	0.33	40	0	0	1	1	3.54	2.66	3.2	1.11	328	2.54	82.6	7.01
1	48	2	100	70	80	0.3	30	0	0	0	0	4.14	1.62	1.6	1.8	255.5	2.18	56	4
1	63	1	140	90	106.67	0.36	50	0	0	1	0	4.6	1.5	2.17	1.6	367	3.41	139.8	4.88
1	51	1	149	106	120.33	0.29	43	1	0	0	0	3.34	0.95	1.65	1.26	441.9	1.75	114	3.4
1	48	1	98	63	74.67	0.36	35	0	0	1	0	3.86	0.93	1.86	1.58	156.9	2.22	79	3.3
1	61	1	130	80	96.67	0.38	50	0	0	1	0	4.2	1.1	2.63	1.3	410	3.96	93.2	4.8
1	69	2	150	90	110	0.4	60	1	0	0	0	4.69	1.31	2.73	1.36	245	2.5	61	6
1	74	2	200	110	140	0.45	90	1	1	0	0	3.06	2.82	0.61	1.17	274	2.3	77	2.8
1	68	1	91	60	70.33	0.34	31	0	0	1	0	3.05	0.63	1.39	1.37	333	2	89	6.5
1	87	1	130	60	83.33	0.54	70	0	0	0	0	3.58	1	2.02	1.11	286.5	2	103	10.8
1	49	1	135	110	118.33	0.19	25	1	0	1	1	6.74	2.54	2.88	1.5	387	2.49	81.7	5.05
1	57	2	115	66	82.33	0.43	49	0	0	0	0	4.46	0.86	2.54	1.3	594	1.8	56	4.1
1	67	1	127	75	92.33	0.41	52	0	0	1	0	5.29	0.71	2.42	1.59	295	1.69	43.4	3.98
1	56	1	120	60	80	0.5	60	1	0	0	1	4.76	1.71	2.61	1.37	364	1.98	78	5.2
1	63	2	120	70	86.67	0.42	50	0	0	0	0	4.5	0.5	2.25	1.6	382	3.26	105	6.09
1	35	1	120	90	100	0.25	30	1	0	0	0	4.81	1.54	2.9	1.21	273	2.04	60	7.3
1	78	1	150	72	98	0.52	78	1	0	0	0	4.98	0.87	3.07	1.47	417	3.19	90	6.76
1	68	2	114	66	82	0.42	48	0	0	0	0	5.3	1.13	3.58	1.25	249	2.14	48	3.22
1	51	1	150	70	96.67	0.53	80	1	0	1	1	6	2.63	3.46	1.34	343	1.68	108	7.6
1	56	2	110	70	83.33	0.36	40	0	0	0	0	3.71	1.49	2.01	1.02	214.3	2.18	60	7.2
1	65	2	156	92	113.33	0.41	64	1	0	0	0	5.8	1.2	3.23	1.6	185	3.74	75.5	3.47
1	76	1	110	70	83.33	0.36	40	1	0	0	0	5.02	1.6	3.34	0.95	480.7	2.3	106	8.9
1	63	1	110	68	82	0.38	42	0	0	1	0	4.46	0.94	2.57	1.46	425.9	1.92	87	5.2
1	67	1	150	70	96.67	0.53	80	1	0	0	0	2.69	1.18	0.89	1.26	192.4	2.9	64.9	9.93
1	60	2	120	80	93.33	0.33	40	0	0	0	1	5.79	2.68	2.96	1.61	267	2.14	59	6.3
1	60	1	150	84	106	0.44	66	1	0	1	1	3.31	2.28	1.93	1.22	448	2.82	68.5	448
1	53	1	120	65	83.33	0.46	55	0	0	0	1	5.4	4.49	2	1.36	356	2.46	82	3.1
1	39	2	120	70	86.67	0.42	50	0	0	0	1	4.65	2.35	2.59	0.99	318.3	2.12	34	2.7
1	52	2	123	71	88.33	0.42	52	0	0	0	0	5.2	0.8	2.33	1.6	171	3.19	77.5	5.74
1	47	1	120	72	88	0.4	48	0	0	1	1	6.39	0.84	4.7	1.76	326	2.43	77.5	4.22
1	59	2	150	100	116.67	0.33	50	1	0	0	1	8.07	1.18	4.22	1.8	369	4.51	84.6	5.7
1	52	2	150	80	103.33	0.47	70	1	1	0	1	4.83	3.73	2.27	0.86	275.3	2.13	60	4
1	53	2	160	100	120	0.38	60	1	1	0	1	3.81	2.41	1.27	1.44	191	2.64	59	4
1	49	1	120	80	93.33	0.33	40	0	0	0	0	4.29	1.11	2.78	0.9	300	3.35	89.3	6.96
1	73	1	103	70	81	0.32	33	0	0	1	1	4.7	3.4	2.25	1.1	498	3.47	94	5.36
1	51	2	110	78	88.67	0.29	32	0	0	0	1	3.94	3.04	1.75	0.81	231.7	2.1	67	3.5
1	68	1	150	82	104.67	0.45	68	1	0	0	0	5.1	0.8	2.48	2	267	2.62	78.6	5.5
1	51	2	110	70	83.33	0.36	40	0	0	0	1	5.03	2.54	3.03	0.85	374.3	2.58	68	4.3
1	76	1	170	90	116.67	0.47	80	1	0	0	0	4.2	0.7	1.95	1.9	316	2.54	85.8	3.9
1	53	1	120	60	80	0.5	60	0	0	0	1	3.4	3.7	1.73	0.9	347	2.19	85.9	3.67
1	67	2	120	80	93.33	0.33	40	0	0	0	1	6.1	2.2	3.68	1.6	264	3.45	66.5	3.9
1	66	2	125	80	95	0.36	45	0	0	0	0	5.8	1.5	3	1.9	282	3.59	84.9	4.06
1	50	2	120	70	86.67	0.42	50	0	0	0	0	3.8	0.89	2.4	1	207	2.66	46	2.2
1	64	2	110	70	83.33	0.36	40	0	0	0	0	4.44	1.34	2.73	1.1	239.8	2.28	84	4.5
1	63	2	110	60	76.67	0.45	50	0	0	0	1	6.94	1.6	4.88	2.3	238	2.2	60.5	5.54
1	51	1	120	90	100	0.25	30	0	0	1	1	5.9	1	3.45	1.7	261	2.67	80.1	4.5
1	63	2	100	80	86.67	0.2	20	0	1	0	0	5.01	1.2	2.82	1.64	310	1.44	91	5.5
1	53	2	80	50	60	0.38	30	0	0	0	0	3.45	1.13	1.78	1.16	210	1.8	60	4
1	55	2	110	70	83.33	0.36	40	0	1	0	0	4.74	1.29	2.72	1.43	320.3	2.01	65	4.1
1	40	1	160	109	126	0.32	51	1	0	0	0	4.5	1	2.93	1.26	267	3.51	60.1	2.14
1	69	2	160	110	126.67	0.31	50	1	0	0	0	4.63	1.16	2.7	1.4	234	1.86	5200	430
1	42	2	120	84	96	0.3	36	1	0	0	0	3.74	0.9	2.24	1.09	232.1	1.52	44	3.5
1	47	2	120	80	93.33	0.33	40	0	0	0	1	4.57	1.91	2.83	0.87	328.7	1.38	4.4	55
1	57	2	130	80	96.67	0.38	50	1	1	0	0	3.24	1.06	1.7	1.06	197.3	1.74	45	3.8
1	68	1	110	70	83.33	0.36	40	0	0	1	0	3.82	1.24	2.35	1.36	356	1.95	93.6	6.51
1	54	2	132	74	93.33	0.44	58	0	0	0	0	3.47	1.3	1.73	1.15	195	1.72	72	7
1	54	1	150	95	113.33	0.37	55	1	0	1	1	4.57	4.06	3.44	1.15	344	2.08	70	7.78
1	66	2	135	59	84.33	0.56	76	1	0	0	0	3.68	1.73	1.69	1.22	213	3.11	46	4.52
1	48	2	120	70	86.67	0.42	50	0	0	0	0	4.48	1.59	2.58	1.18	236.2	1.65	66	3.7
1	63	1	110	70	83.33	0.36	40	0	0	0	1	5.67	0.85	4	1.28	191.3	2.74	91	7.6
1	61	1	132	88	102.67	0.33	44	1	0	1	1	5.49	1.19	3.84	1.11	386.5	2.28	84	6.4
1	66	1	140	80	100	0.43	60	1	0	0	1	4.56	1.7	2.62	1.17	428	2.56	97	4.9
1	55	1	100	60	73.33	0.4	40	0	0	0	0	3.91	0.66	2.72	1.01	350	2.15	62.1	3.63
1	75	1	150	104	119.33	0.31	46	1	0	1	0	3.62	1.58	1.71	1.19	399	2.82	104	5.2
1	76	2	120	80	93.33	0.33	40	1	0	0	0	4.53	0.82	2.91	1.25	345.2	2.96	80	6
1	63	1	118	72	87.33	0.39	46	0	0	0	0	4.7	1.3	2.25	1.9	369	3.19	100	4.7
1	66	2	120	70	86.67	0.42	50	0	0	0	0	3.31	1.28	2.84	1.43	209	2.6	50.4	4.82
1	55	1	120	80	93.33	0.33	40	1	0	0	0	3.1	1.24	1.34	1.2	494	2.02	76	3.7
1	57	2	100	65	76.67	0.35	35	0	0	0	1	5.59	1.7	2.92	1.9	259	1.58	79	5.5
1	55	1	120	90	100	0.25	30	0	0	1	1	4.34	3.12	1.8	1.12	389	1.84	83	3.6
1	54	1	120	80	93.33	0.33	40	1	0	0	1	4.33	2.11	2.18	1.19	373	3	158	9.2
1	76	1	116	80	92	0.31	36	0	0	1	0	3.7	1.5	2.63	0.9	405	3.39	95.3	5
1	35	2	110	65	80	0.41	45	0	0	0	1	5.26	0.94	3.44	1.39	139	1.5	42	2.7
1	69	1	150	80	103.33	0.47	70	0	0	0	0	4.2	0.8	1.62	1.8	281	3.68	116.3	8.23
1	51	1	144	96	112	0.33	48	0	0	1	1	4.5	3.8	3	0.81	377	2.76	92.5	5.23
1	56	2	130	70	90	0.46	60	1	0	0	1	4.37	1.86	2.36	1.16	329	3.14	62	3.8
1	57	2	120	80	93.33	0.33	40	0	0	0	1	5.6	1.79	2.58	2.21	181	2	79	3.8
1	56	2	130	85	100	0.35	45	0	0	0	1	6.2	2.1	3.83	1.9	298	3.03	65.5	4.01
1	65	1	160	90	113.33	0.44	70	1	0	0	0	3.3	0.7	1.43	1.4	346	3.2	114	4.88
1	48	1	130	70	90	0.46	60	0	0	0	0	4	0.9	2.33	1.3	442	2.72	83.8	3.2
1	70	2	120	80	93.33	0.33	40	0	0	0	0	3.99	0.75	2.26	1.39	195.4	3.26	51	4.7
1	62	2	160	80	106.67	0.5	80	1	0	0	0	4.8	1.7	3	1.4	274	2.74	76.9	5.3
1	57	1	140	90	106.67	0.36	50	1	0	1	0	3.9	1.41	2.12	1.14	291.7	2.31	36	3.4
1	50	1	155	95	115	0.39	60	1	0	0	0	4.04	1.55	2.49	0.85	313	2.4	83	6.9
1	57	1	140	80	100	0.43	60	0	0	1	0	2.32	0.8	0.88	1.08	276	1.7	77	5.7
1	41	1	130	80	96.67	0.38	50	0	0	1	1	6.03	1.18	3.84	1.65	340.2	1.74	74	7
1	52	2	98	60	72.67	0.39	38	0	0	0	1	4.36	1.7	2.26	1.33	272.5	2.46	39	2.7
1	61	1	100	60	73.33	0.4	40	0	0	1	1	6.5	0.6	4.35	1.7	212	4.07	100.9	6.1
1	61	2	140	80	100	0.43	60	1	0	0	0	4.63	0.76	3.36	1.5	251	2.44	52.2	4.5
1	47	1	134	100	111.33	0.25	34	1	0	0	0	4.56	1.27	2.99	0.99	333.4	2	69	4.6
1	60	1	120	90	100	0.25	30	0	0	0	0	4.3	0.74	2.39	1.73	298	2.42	89.3	7.22
1	55	2	120	80	93.33	0.33	40	0	0	0	1	5.73	1.06	3.47	1.78	161.8	2.3	61	5.3
1	60	1	140	80	100	0.43	60	0	0	0	0	2.81	0.93	1.49	0.88	316	2.69	99	5.43
1	53	1	130	70	90	0.46	60	0	0	0	1	3.2	3.57	1.82	0.7	430	2.62	98.8	4.18
1	64	1	160	80	106.67	0.5	80	1	1	1	1	3.36	1.87	1.45	1.06	268	2.7	74	6.3
1	74	1	170	80	110	0.53	90	1	0	0	0	3.06	0.75	2.12	0.6	204	3.24	101	4.5
1	56	2	150	90	110	0.4	60	1	0	0	1	6.03	2.2	3.74	1.29	358.8	2.3	70	4.3
1	66	2	140	80	100	0.43	60	1	0	0	0	4.43	1.16	2.62	1.28	189	2.08	69	5.9
1	59	1	150	90	110	0.4	60	1	0	1	0	5.63	1.54	3.7	1.17	294	2.29	88	294
1	30	1	124	80	94.67	0.35	44	0	0	0	1	4.43	2.52	2.6	1.24	339	2.83	67.6	4.02
1	68	2	180	105	130	0.42	75	1	0	0	0	5.32	1.44	4.51	1.53	359	3.43	67.6	6.11
1	49	2	144	95	111.33	0.34	49	1	0	0	0	4.2	0.72	2.64	1.62	180	2.56	83	4.81
1	87	2	126	70	88.67	0.44	56	0	0	0	0	2.28	0.61	0.63	1.37	224	3.2	49	6.3
1	62	1	130	80	96.67	0.38	50	0	0	1	1	6.01	5.63	2.2	1.25	468	1.56	125	5.9
1	79	2	133	78	96.33	0.41	55	0	0	0	0	3.23	1.14	1.71	1.17	271	1.73	90	8.3
1	47	2	160	105	123.33	0.34	55	1	0	0	0	4.26	1.21	2.8	1.8	403	3.73	86	5.15
1	58	1	160	80	106.67	0.5	80	1	0	1	0	3.64	1.19	1.93	1.17	471.1	2.12	158	8.2
1	42	1	150	80	103.33	0.47	70	1	0	0	0	5.64	1.1	4.22	1.08	326	3.31	72.5	4.66
1	77	2	139	90	106.33	0.35	49	1	0	0	0	5.73	1.42	3.1	2.03	302	3.43	59.2	6.14
1	70	1	171	88	115.67	0.49	83	1	0	0	0	4.7	1.8	3.3	1.1	458	3.27	87.6	5.07
1	60	2	120	80	93.33	0.33	40	0	0	0	1	6.6	3.2	3.9	1.5	316	3.04	83.1	5.19
1	67	1	112	80	90.67	0.29	32	0	0	1	0	4.27	1.05	2.88	1.1	419	4.14	92.1	8.57
1	73	1	116	70	85.33	0.4	46	0	0	1	1	5.8	2.2	3.83	1.3	374	1.5	94.4	4.6
1	59	1	141	87	105	0.38	54	1	0	0	1	6.9	1.46	4.79	1.45	448.7	1.72	87	4.7
1	57	1	124	82	96	0.34	42	0	0	0	0	3.8	1.1	2.03	1.4	378	1.9	93	3.75
1	76	1	140	70	93.33	0.5	70	1	0	0	0	4.69	4.4	1.36	1.33	455	2.56	137	11.5
1	47	1	108	68	81.33	0.37	40	0	0	0	0	6.2	2.4	3.75	1.2	411	2.6	89	4.76
1	45	2	120	80	93.33	0.33	40	0	0	0	0	6.23	1.05	3.63	2.12	375	4.58	54	5.4
1	49	2	140	100	113.33	0.29	40	1	0	0	1	7.01	2.12	4.31	1.74	283	2.32	83	5.4
1	62	2	110	80	90	0.27	30	0	0	0	0	4.8	0.6	2.55	1.7	237	2.92	121.7	6.38
1	60	2	117	76	89.67	0.35	41	0	0	0	0	5.2	1.2	2.55	1.6	384	3.04	93	5.64
1	59	1	130	80	96.67	0.38	50	1	1	0	0	3.6	1	1.88	1.3	399	3.16	96.6	6.81
1	50	2	100	64	76	0.36	36	0	0	0	0	4.04	1.62	1.78	1.52	152	2.2	80	370
1	62	1	132	74	93.33	0.44	58	0	0	0	1	6.2	5	3.15	1.4	466	3.3	101	5.04
1	74	2	162	86	111.33	0.47	76	1	1	0	0	5.1	1.57	2.72	1.67	220	2.54	66	3
1	66	1	128	82	97.33	0.36	46	1	0	1	0	4.59	1.13	3.2	1.48	363	3.19	90.7	3.76
1	57	1	126	80	95.33	0.37	46	0	0	1	1	4.66	4.57	1.68	0.9	348	2.4	113	7.5
1	62	2	118	76	90	0.36	42	1	0	0	0	3.27	1.19	1.95	0.78	566	2.34	58	5.2
2	63	1	152	68	96	0.552632	84	1	0	0	0	6.58	1.26	4.47	1.54	288	2	88	5.3
2	81	2	146	70	95.3333	0.520548	76	1	0	0	0	4.71	1.42	2.68	1.38	364	1.86	67	6.5
2	44	1	144	90	108	0.375	54	1	1	0	1	5.03	2.09	3.13	0.95	391	2.15	89	5.1
2	79	1	185	80	115	0.567568	105	1	0	0	1	5.61	0.73	3.52	1.76	341	2.6	84	5.2
2	54	2	100	60	73.3333	0.4	40	0	1	0	0	3.5	0.92	2.4	0.68	172	3.24	54	5.7
2	68	2	133	78	96.3333	0.413534	55	1	0	0	0	5.72	0.91	3.33	1.39	215	2.98	53	8.37
2	50	2	163	114	130.333	0.300613	49	1	0	0	0	4.35	1.29	3.4	0.9	262	5.55	77.4	3.35
2	82	1	118	70	86	0.40678	48	0	1	0	1	6.77	3.38	3.97	1.26	427	1.7	115	7.9
2	77	1	160	100	120	0.375	60	1	0	0	0	3.41	0.99	1.85	1.11	476	2.24	97	5.7
2	79	1	140	80	100	0.428571	60	1	0	0	1	4.04	3.25	1.49	1.07	428	2.1	130	7.3
2	62	1	120	70	86.6667	0.416667	50	0	0	0	1	5.2	1.44	2.82	1.73	310	4.36	103	3.9
2	63	1	150	109	122.667	0.273333	41	1	0	0	0	3.91	1.31	2.74	0.83	271	3.74	67.5	6.36
2	68	2	124	68	86.6667	0.451613	56	1	0	0	1	5.98	1.3	3.56	1.83	296	2.34	77	9.3
2	54	1	102	60	74	0.411765	42	0	1	1	1	3.47	3.33	1.38	0.58	352	2.56	70	5.4
2	72	1	150	70	96.6667	0.533333	80	1	0	1	1	4.6	2.8	2.7	1.4	491	4.76	163.6	8.5
2	51	1	150	90	110	0.4	60	1	0	1	0	4.3	1.3	2.48	0.9	318	4.84	88	3.39
2	59	1	170	100	123.333	0.411765	70	1	0	0	0	5.05	0.83	3.11	1.59	294	3.55	77.9	6.66
2	79	1	148	97	114	0.344595	51	1	1	1	0	3.9	0.7	2.7	1.1	481	3.73	171.3	9
2	48	1	140	40	73.3333	0.714286	100	0	0	0	0	4.34	0.95	2.59	1.1	456	6.22	52.3	4.18
2	49	2	160	100	120	0.375	60	1	1	0	1	4.32	8.07	0.55	0.1	341	2.2	82	4.4
2	83	1	138	80	99.3333	0.42029	58	1	0	1	0	3.7	1.17	2.09	1.08	289	2.14	84	5.6
2	86	1	140	80	100	0.428571	60	0	0	0	1	5.02	1.95	3.4	1.62	382	3.64	60.3	3.34
2	69	2	119	74	89	0.378151	45	1	1	0	0	2.25	0.79	1.12	0.77	425	2.14	70	7.1
2	70	1	220	120	153.333	0.454545	100	1	1	0	0	2.7	1.65	1.12	0.6	223	2.45	94.1	16.41
2	49	1	150	90	110	0.4	60	0	1	1	1	4.97	5.03	3.36	0.97	486	3.71	66.3	5.22
2	75	1	125	70	88.3333	0.44	55	0	1	0	0	2.94	1.28	2.11	0.72	168	7.88	49.7	6.54
2	63	1	126	80	95.3333	0.365079	46	1	0	1	0	4.55	0.78	2.21	1.8	591	3.61	66.8	4.49
2	57	1	154	87	109.333	0.435065	67	1	1	0	1	4.64	2.31	2.5	1.4	453	3.59	77.9	5.01
2	60	1	140	60	86.6667	0.571429	80	1	1	1	0	3.42	0.61	1.4	1.18	398	3.93	699	9.68
2	82	1	110	60	76.6667	0.454545	50	1	0	1	1	2.4	0.8	1.13	1.1	219	4.27	106.1	5.8
2	58	1	110	60	76.6667	0.454545	50	0	1	0	0	2.97	1.29	1.4	0.89	337	2	85	8.6
2	55	2	144	76	98.6667	0.472222	68	0	0	0	0	4.4	0.93	2.72	1.62	593	6.16	59.7	4.78
2	74	2	170	53	92	0.688235	117	1	0	0	1	6.05	1.53	3.91	1.55	356	4.63	61	5.8
2	78	1	197	104	135	0.472081	93	1	0	0	1	5.42	0.72	3.62	1.47	277	1.92	113	6.5
2	79	2	120	50	73.3333	0.583333	70	1	1	0	0	4.71	1.09	2.78	1.43	320.6	2.92	608.9	25
2	47	1	140	100	113.333	0.285714	40	1	0	0	0	3.13	0.64	1.61	1.23	537.5	2	101	3.5
2	86	2	120	80	93.3333	0.333333	40	1	0	0	0	4.51	1.25	2.98	0.9	358	4.86	64.6	5.47
2	70	2	120	80	93.3333	0.333333	40	1	1	0	0	5.05	1.57	2.21	1.7	324	3.91	106	8.29
2	45	1	150	100	116.667	0.333333	50	1	0	0	1	4.5	3.4	2.33	0.9	239	2.65	72.8	2.16
2	42	1	220	136	164	0.381818	84	1	0	1	1	4.54	3.11	3	0.6	476	2.57	109.4	5.91
2	68	2	131	87	101.667	0.335878	44	1	1	0	1	8.3	4	5.03	2.25	293	2.65	68.3	2.96
2	76	1	136	82	100	0.397059	54	1	1	1	0	3.62	1.23	1.96	1.32	444	5.06	76.6	4.77
2	67	1	210	110	143.333	0.47619	100	1	0	1	0	3.8	1.1	2.03	1.1	538	2.62	143.4	7.97
2	56	2	138	80	99.3333	0.42029	58	0	0	0	1	6.3	1.1	4.58	1.3	262	4.09	77.4	5.6
2	78	2	150	80	103.333	0.466667	70	1	0	0	1	8.46	2.68	5.81	1.43	307.7	2.34	100	9.9
2	83	1	170	72	104.667	0.576471	98	1	1	0	1	4.21	2.15	2.31	1.3	357	4.24	93	5.57
2	82	1	190	100	130	0.473684	90	1	0	1	0	3.38	0.93	1.63	0.6	136	6.56	69.3	11.18
2	69	1	145	80	101.667	0.448276	65	0	0	1	0	4.32	2.01	1.92	0.9	282	2.74	83.6	5.67
2	61	1	138	68	91.3333	0.507246	70	1	1	1	0	3.13	1.6	1.93	0.8	460	6	83	5.54
2	59	1	140	80	100	0.428571	60	1	1	1	1	5.6	4.2	3.74	0.8	332	2.77	71.5	4.24
2	59	2	160	100	120	0.375	60	1	0	0	1	5.55	3.27	3.16	1.28	296	2.78	56.1	6.26
2	52	1	170	110	130	0.352941	60	1	1	1	1	4.39	2.15	2.71	1.12	641	6.34	154.5	9.67
2	59	1	120	70	86.6667	0.416667	50	0	0	1	1	4.57	3.06	2.09	1.09	293	2.3	68	5.6
2	62	1	158	102	120.667	0.35443	56	1	0	0	1	5.71	2.35	3.79	1.35	498	4.77	115	6.66
2	73	2	190	100	130	0.473684	90	1	1	0	1	8.07	2.17	5.47	1.44	243	3.61	60.3	5.48
2	78	1	126	72	90	0.428571	54	0	0	1	1	7.3	0.9	5.25	1.3	201	5.1	76.8	2.8
2	67	1	130	78	95.3333	0.4	52	1	0	0	1	3.43	2.38	1.37	0.98	309	2.64	80	4.3
2	75	1	180	90	120	0.5	90	1	0	0	1	5.2	2.9	3.45	1.2	342	3.85	110.2	4.56
2	57	1	190	100	130	0.473684	90	1	1	1	1	7.6	5.7	4.5	1.3	560	4.26	111.2	9.14
2	75	2	138	83	101.333	0.398551	55	0	0	1	1	4.7	2.7	3.75	1.1	342	3.93	76.4	4.4
2	64	1	120	70	86.6667	0.416667	50	0	0	1	0	3.74	0.93	2.06	1.26	327	2.02	99	7
2	73	1	160	70	100	0.5625	90	1	1	1	0	4.9	0.8	2.78	1.4	377	4.07	107.3	4.97
2	85	1	125	80	95	0.36	45	1	0	1	0	3.35	0.41	1.25	1.3	284	5.22	86.4	8.9
2	86	1	177	90	119	0.491525	87	1	1	1	1	5.36	2.47	4.02	1.06	225	4.98	131	7.22
2	71	1	160	92	114.667	0.425	68	1	1	0	1	5.12	4.35	1.7	1.44	316	2.48	143	10
2	69	1	184	115	138	0.375	69	1	0	1	0	3.2	0.63	1.73	1.49	296	5.4	77.2	3.65
2	74	1	150	80	103.333	0.466667	70	1	0	1	0	3.75	1.32	4.8	1	484	5.67	110.8	5.66
2	65	2	140	76	97.3333	0.457143	64	0	0	0	1	6.32	1.94	4.21	1.59	579	4.19	60	3.92
2	69	2	127	64	85	0.496063	63	1	0	0	1	4.08	3.01	1.8	0.91	283	1.82	54	5.9
2	63	2	148	75	99.3333	0.493243	73	0	1	0	1	4.91	2.27	2.94	1.48	422	3.87	69.9	3.04
2	63	1	150	100	116.667	0.333333	50	1	0	1	0	4.43	1.25	3.12	1.53	541	3.96	101.2	10.28
2	66	2	180	90	120	0.5	90	1	1	0	1	4.35	2.8	2.9	1.4	233	3.79	58	3.33
2	61	1	108	66	80	0.388889	42	0	0	0	0	4.85	0.72	3.91	1.53	292	3.44	72	5.07
2	78	2	130	90	103.333	0.307692	40	1	0	0	1	3.52	1.72	1.77	0.97	322.3	1.84	136	8
2	78	2	142	90	107.333	0.366197	52	1	0	0	0	3.71	0.88	2.28	1.03	259.4	2.58	66	3.5
2	59	2	140	90	106.667	0.357143	50	1	0	0	1	5.21	2.2	2.83	1.38	370	1.56	96	4.8
2	67	1	122	80	94	0.344262	42	1	1	0	1	4.49	3.85	2.15	0.59	335.3	3.8	964	18
2	83	1	180	80	113.333	0.555556	100	1	0	1	1	4.03	3.1	2.15	1.17	255	3.5	87	5.91
2	72	1	130	90	103.333	0.307692	40	0	1	1	0	5.2	1.3	2.33	1.3	311	5.94	82.7	3.46
2	60	2	167	92	117	0.449102	75	1	0	0	1	5.9	3	4.34	1.53	328	2.31	43	4.49
2	57	1	120	80	93.3333	0.333333	40	0	1	1	0	4.33	1.02	2.58	1.29	320	2.14	110	7
2	64	1	150	80	103.333	0.466667	70	1	1	1	0	5.18	0.98	3.07	1.2	355	4.72	96	5.13
2	62	1	150	80	103.333	0.466667	70	1	1	1	0	5.18	0.98	3.07	1.2	355	4.72	96	5.13
2	79	1	139	96	110.333	0.309353	43	0	0	0	0	3.91	0.95	2.12	1.36	286.6	2.3	113	9.4
2	66	1	125	80	95	0.36	45	1	1	1	1	3.26	1.79	1.77	0.68	441	1.46	76	4.6
2	78	2	142	70	94	0.507042	72	1	0	0	0	4.99	1.1	3.14	2.22	301	4.5	80.5	10.9
2	61	1	106	70	82	0.339623	36	0	0	1	1	4.2	2.7	2.48	0.8	295	3.37	86.4	6.1
2	82	2	114	68	83.3333	0.403509	46	1	0	0	0	4.46	1.06	2.76	1.22	271	3.9	55	9.8
2	57	2	130	80	96.6667	0.384615	50	1	0	0	0	4.47	0.92	2.56	1.49	240.3	2.38	47.4	2.49
2	66	2	190	80	116.667	0.578947	110	1	1	0	1	5.27	2.5	3.11	1.02	276.3	1.98	67	4.9
2	71	1	127	71	89.6667	0.440945	56	1	0	1	1	4.84	2.28	3.34	1.31	445	4.36	78.5	6.62
2	83	1	180	90	120	0.5	90	1	0	1	0	4.46	1.54	2.36	1.09	506	2.23	111.8	5.19
2	78	2	119	56	77	0.529412	63	0	1	0	1	4	3.19	2.33	1.16	252	4.86	62	10.78
2	68	1	138	65	89.3333	0.528986	73	1	1	1	0	2.11	1.07	0.83	0.79	316	2	62	3.8
2	51	1	146	95	112	0.349315	51	1	1	1	1	7.39	6.72	1.5	1.23	488	6.2	80	6.45
2	78	2	152	76	101.333	0.5	76	1	1	0	0	4.84	1.71	3.26	1.71	338	6.38	43.2	5.09
2	72	1	130	86	100.667	0.338462	44	1	0	0	0	2.57	0.81	1.45	0.75	502	2.8	158	10.2
2	70	1	120	70	86.6667	0.416667	50	0	0	0	1	4.75	1.89	3.26	0.9	352	3.04	82.3	4.91
2	44	2	155	101	119	0.348387	54	1	0	0	0	4.84	0.66	2.77	1.31	255	6.08	49	4.49
2	71	1	130	80	96.6667	0.384615	50	1	0	0	1	5.36	3.81	2.38	1.25	529	2.06	79	6.6
2	58	1	140	80	100	0.428571	60	0	1	0	0	2.6	0.5	1.5	1	197	3.93	73.8	3.3
2	46	1	135	80	98.3333	0.407407	55	1	0	0	1	5	1.9	3.15	1.4	446	3.86	75.7	6.83
2	78	2	131	79	96.3333	0.396947	52	0	0	0	0	4.54	0.68	2.67	1.56	149	2.82	84	5.1
2	62	1	140	90	106.667	0.357143	50	1	0	1	0	3.47	1.2	2.85	1.17	328	3.33	66	3.25
2	75	1	148	94	112	0.364865	54	1	1	1	1	9.22	5.01	6.26	2.41	331	5.42	94	10.15
2	64	1	130	70	90	0.461538	60	1	1	1	1	7.1	5.1	4.8	1.4	398	6.85	91.1	6.5
2	55	1	100	70	80	0.3	30	1	1	1	0	4.96	1.6	3.7	1.6	495	4.38	81	5.58
2	42	1	160	90	113.333	0.4375	70	1	0	1	1	5.17	3.07	2.56	1.21	447	1.38	104	6
2	82	2	180	100	126.667	0.444444	80	1	1	1	1	3.7	2.1	3.6	1.9	344	5.6	111.7	4.8
2	74	2	140	90	106.667	0.357143	50	1	1	0	1	2.8	7.65	1.43	0.65	212.7	5.12	82	5.3
2	88	2	180	90	120	0.5	90	1	0	0	1	5.06	0.86	2.94	1.73	272.9	2.18	93	5.1
2	77	1	145	80	101.667	0.448276	65	1	0	0	1	6.76	1.67	4.27	1.18	467	4.61	104.3	5.94
2	61	1	180	110	133.333	0.388889	70	1	0	0	1	5.26	1.08	3.11	1.66	411	2.2	82	6
2	54	1	154	73	100	0.525974	81	1	1	1	0	2.18	1.29	1.2	1.1	268	3.37	75	6.16
2	63	1	115	70	85	0.391304	45	0	0	1	0	3.16	1.69	1.92	0.72	458	4.05	119.8	5.95
2	80	1	150	80	103.333	0.466667	70	0	0	1	0	3.3	0.5	1.65	1.3	274	5.1	72.6	8.4
2	79	1	178	82	114	0.539326	96	1	0	1	0	4.26	0.65	2.81	1.62	468	5.82	114	7.69
2	70	1	116	80	92	0.310345	36	0	0	1	0	2.35	1.03	1.37	0.66	374	3.08	80.1	2.67
2	49	1	150	95	113.333	0.366667	55	1	0	1	1	4.42	2.46	2.69	1.08	478	2.82	96.2	7.47
2	64	1	115	85	95	0.26087	30	0	0	1	0	3.64	0.62	1.96	1.4	301	1.98	90.4	6.1
2	79	1	160	81	107.333	0.49375	79	1	0	0	0	2.77	0.76	1.35	1.07	331	2.08	115	5.6
2	77	1	140	80	100	0.428571	60	1	0	0	0	3.2	1.3	1.28	1.6	476	2.64	85.7	4.41
2	74	2	123	66	85	0.463415	57	1	1	0	1	5.41	2.28	3.05	1.47	303	1.91	56.6	7.27
2	64	2	159	89	112.333	0.440252	70	0	1	1	0	3.11	0.88	1.92	0.6	265	3.66	40.9	2.04
2	78	2	136	82	100	0.397059	54	0	0	0	1	8.3	1.7	5.55	1.6	308	6.39	97.8	5.8
2	79	1	98	75	82.6667	0.234694	23	0	1	0	0	2.4	1.4	1.43	0.6	106	7.03	93.6	11.2
2	68	1	140	90	106.667	0.357143	50	1	0	0	1	5.77	2.39	4.01	1.03	398	2.99	100	6.9
2	78	1	128	64	85.3333	0.5	64	1	1	0	0	3.96	1.53	2.46	0.8	119.2	2	79	4.5
2	54	1	115	70	85	0.391304	45	0	0	0	0	5	1.24	3.74	1.53	587	4.15	56.2	2.87
2	65	1	155	70	98.3333	0.548387	85	1	1	0	0	4.44	1.37	2.42	1.4	432	2.36	1286	27.3
2	76	1	130	80	96.6667	0.384615	50	0	0	1	0	4.82	0.89	3.57	1.89	430	5.99	104	6.13
2	57	2	120	80	93.3333	0.333333	40	0	0	0	1	3.84	1.95	1.67	1.28	230	1.69	68	4.9
2	66	1	99	64	75.6667	0.353535	35	1	1	1	0	4.81	1.55	3.78	1.2	340	3.07	109.7	5.98
2	69	2	142	70	94	0.507042	72	0	1	0	1	6.8	1.1	3.68	2.2	281	6.3	65.7	5.35
2	41	1	130	80	96.6667	0.384615	50	0	0	0	0	4.41	1.35	3.03	0.77	373.2	2.08	77	5.2
2	78	2	110	65	80	0.409091	45	1	1	0	1	4.23	1.89	2.42	0.95	525	3.04	1571	39.7
2	64	1	170	110	130	0.352941	60	1	0	0	1	5.49	3.31	3.86	1.41	341	3.42	79.2	5.76
2	64	2	135	65	88.3333	0.518519	70	1	0	1	0	4.23	1.75	2.51	1.17	353	2.77	68.5	4.88
2	62	1	160	90	113.333	0.4375	70	1	0	1	1	6.96	3.35	4.9	1.89	369	3.5	75	2.82
2	62	2	110	70	83.3333	0.363636	40	0	0	0	1	3.29	6.24	0.6	0.48	224.6	2.07	50	5.5
2	67	1	160	80	106.667	0.5	80	1	1	0	0	3.18	0.75	1.82	1.35	291	7.19	68.5	5.71
2	62	2	160	100	120	0.375	60	1	1	0	0	3.41	1.44	1.45	1.37	135	2.58	49	4.11
2	70	1	120	80	93.3333	0.333333	40	1	0	0	1	4.82	7.78	0.24	1.04	487	1.24	92	5.9
2	65	2	120	62	81.3333	0.483333	58	0	1	0	1	7.98	2.03	7.09	1.34	383	3.54	52.4	6.57
2	63	2	130	68	88.6667	0.476923	62	0	1	0	1	7.98	2.03	7.09	1.34	383	3.51	52.4	6.57
2	61	1	131	80	97	0.389313	51	1	0	1	1	3.75	2.19	2.4	1.08	350	5.49	83.1	6.2
2	68	1	120	83	95.3333	0.308333	37	0	0	0	0	3.17	0.79	2.13	1.26	514	8.14	86	4.24
2	65	1	110	70	83.3333	0.363636	40	0	0	1	1	5.6	2.4	3.45	1.3	314	5.88	96.5	3.9
2	60	2	160	90	113.333	0.4375	70	1	0	0	1	5.24	2.06	3.2	1.1	260.1	2.42	60	5.2
2	69	2	120	70	86.6667	0.416667	50	0	0	0	0	4.19	2.02	2.08	1.19	337.9	1.78	66	8.5
2	84	1	143	79	100.333	0.447552	64	1	0	0	0	3.52	1.38	1.92	0.9	390	2.07	82.7	6
2	75	2	120	60	80	0.5	60	1	0	0	0	3.4	1.53	1.38	1.32	242	2.56	91	4.3
2	76	2	141	72	95	0.489362	69	1	0	0	1	4.01	3.12	2	1.4	320	3.28	83.5	3.41
2	53	1	100	80	86.6667	0.2	20	0	1	1	1	7.8	6.8	4.43	1.4	451	2.91	87.5	4.5
2	50	1	120	70	86.6667	0.416667	50	0	0	1	1	5.01	2.48	2.79	1.09	298	2.9	61	3.7
2	61	1	107	57	73.6667	0.46729	50	0	0	1	0	4.8	1.4	3.36	1.2	320	6.5	92.2	6.05
2	47	1	135	88	103.667	0.348148	47	1	0	1	1	6.02	3.66	3.82	1.32	454	5.59	121.7	8.66
2	80	2	152	79	103.333	0.480263	73	1	0	1	0	3.84	0.79	1.6	1.25	224	6.13	63	3.91
2	78	1	180	120	140	0.333333	60	1	0	0	1	4.2	2.4	2.33	1.1	339	3.16	92.2	6.55
2	48	2	145	90	108.333	0.37931	55	1	0	0	1	4.52	1.92	2.45	1.2	308.7	1.6	78	2.8
2	60	1	130	85	100	0.346154	45	1	1	1	1	6.9	3	2.55	1.7	306	4.24	89.7	7.09
2	62	1	150	100	116.667	0.333333	50	1	0	0	0	5.5	1.2	3.38	1.2	360	1.95	121.9	5.69
2	40	1	134	95	108	0.291045	39	1	0	1	1	4.7	2.9	3.49	0.99	477	3.72	81	4.54
2	59	1	140	80	100	0.428571	60	1	1	1	0	4.85	1.43	3.81	1.24	237	2.14	87.3	8.85
2	61	2	130	65	86.6667	0.5	65	0	0	0	0	3.13	1.22	0.99	1.59	222.5	3.12	74	3.1
2	51	1	120	80	93.3333	0.333333	40	0	0	1	1	6.4	1.1	4.28	1.2	318	2.98	122.6	6.37
2	69	1	107	74	85	0.308411	33	0	0	1	0	3.86	1.15	2.15	1.19	389	2.76	145	4.9
2	70	1	130	68	88.6667	0.476923	62	0	0	1	0	3.49	1.24	1.51	1.26	458	2.57	71.1	5.52
2	55	1	180	85	116.667	0.527778	95	1	0	1	0	4.95	1.04	3.07	1.35	263	2.93	81	5.38
2	74	2	155	85	108.333	0.451613	70	1	0	0	0	4.13	0.96	2.29	1.4	121.5	2.36	49	5.8
2	61	1	104	60	74.6667	0.423077	44	0	0	1	0	4.3	0.8	2.25	1.6	433	4.27	97.4	3.45
2	79	1	160	100	120	0.375	60	1	1	0	1	5.32	3.79	4.42	1.35	464	5.85	105	6.04
2	63	1	132	87	102	0.340909	45	1	0	1	0	3.85	1.18	2.02	1.62	435	5.16	102.7	4.78
2	67	1	160	90	113.333	0.4375	70	1	0	1	0	3.68	1.12	2.05	1.12	266	1.4	72	6.5
2	82	1	120	70	86.6667	0.416667	50	1	0	1	1	4.07	2.76	1.64	1.18	593	3.92	107	4.3
2	56	1	140	84	102.667	0.4	56	1	0	1	1	3	2.66	1.55	0.98	283	5.32	89.3	5.07
2	70	1	124	70	88	0.435484	54	0	0	1	0	3.72	0.94	1.78	1.44	569	2.5	89.6	2.98
2	65	2	130	86	100.667	0.338462	44	0	1	0	1	5.73	3.91	3.67	1.32	270	3.45	63	6.59
2	83	1	150	80	103.333	0.466667	70	1	0	0	0	5.5	1.3	3.6	1	434	4.76	109.3	6.29
2	84	1	150	70	96.6667	0.533333	80	1	1	0	1	5.45	4.51	2.4	1.53	554	3.44	106.8	10.69
2	59	2	150	100	116.667	0.333333	50	1	1	0	1	4.97	1.9	2.98	1.13	229.6	1.54	59	6.5
2	67	1	117	73	87.6667	0.376068	44	0	0	1	1	4.67	2.19	2.45	1.95	464	5.51	137.6	9.66
2	51	1	145	85	105	0.413793	60	1	0	1	0	3.48	0.66	1.3	2	378	2.09	84	3.65
2	58	1	150	96	114	0.36	54	1	0	0	0	3.67	0.81	2.87	1.5	409	2.74	70.4	4.84
2	60	1	156	103	120.667	0.339744	53	1	1	0	1	3.93	1.8	2.22	0.89	357.1	2.66	92	4.4
2	69	1	130	80	96.6667	0.384615	50	0	0	0	1	4.93	3.32	2.33	1.09	316	2.3	41	5.9
2	66	2	130	86	100.667	0.338462	44	0	0	0	1	4.62	4.31	1.76	1.17	379	4.25	60.2	7.39
2	68	1	125	70	88.3333	0.44	55	0	1	1	0	4.23	1.07	1.05	2.16	396	3.87	43.5	5.04
2	66	1	120	65	83.3333	0.458333	55	0	0	1	0	3.04	0.7	1.65	1.7	360.6	3.18	105	7.4
2	67	2	108	60	76	0.444444	48	0	0	0	1	6.36	2.31	4.08	1.45	316	2.89	57.5	6.27
2	62	1	100	69	79.3333	0.31	31	0	0	1	0	5.85	1.47	3.36	1.2	249	5.16	77	5.27
2	47	1	140	98	112	0.3	42	1	1	0	1	3.32	3.58	0.92	0.77	446.8	2.04	137	5.5
2	73	1	100	70	80	0.3	30	0	1	1	0	4.4	0.7	3	1.1	386	3.55	111.8	7.2
2	51	1	181	102	128.333	0.436464	79	1	1	1	0	4.9	1.52	2.81	1.35	568	4.81	63	2.33
2	73	1	110	70	83.3333	0.363636	40	0	1	1	0	5.1	1.2	2.78	1.4	459	5.12	100.6	6.69
2	61	1	161	90	113.667	0.440994	71	1	0	1	1	4.35	3.93	1.44	0.8	441	3.08	90.3	4.69
2	70	2	150	80	103.333	0.466667	70	1	0	0	1	5.57	1.89	3.7	1.6	248	2.45	71	4.27
2	63	1	130	70	90	0.461538	60	0	0	0	1	4.94	1.4	3.29	1.01	243.8	2.4	70	5.8
2	67	1	115	75	88.3333	0.347826	40	0	0	1	0	5.25	1.58	3.36	1.5	247	3.79	72.5	6.41
2	79	1	150	80	103.333	0.466667	70	1	0	0	1	5.54	0.8	3.35	1.83	591	1.68	112	7.9
2	70	1	140	80	100	0.428571	60	0	0	1	0	4.3	1	2.63	1.6	295	4.24	93.5	4.1
2	46	1	123	59	80.3333	0.520325	64	0	0	1	0	3.81	1.56	2.78	0.7	321	2.76	96	4.63
2	67	2	160	85	110	0.46875	75	1	1	0	1	5.34	1.68	3.33	1.25	398.2	2.48	52	6.7
2	78	1	150	90	110	0.4	60	1	0	1	0	3.61	1.28	1.49	1.4	409	2.51	97.2	7.68
2	69	1	140	90	106.667	0.357143	50	0	0	0	1	3.07	1.93	1.15	1	587	2.66	165.4	8.76
2	81	1	230	110	150	0.521739	120	1	1	1	0	4.25	1.76	2.77	1.14	370	4.85	110.9	9.38
2	62	1	150	80	103.333	0.466667	70	1	0	1	0	4.15	1.48	2.89	1.17	423	6.08	91.5	8.33
2	53	1	160	100	120	0.375	60	1	0	1	1	3.19	2.25	1.49	0.68	566.9	2	114	6.4
